# Supplementary material for: Dynamics of Ex Vivo Mesenchymal Stromal Cell Potency under Continuous Perfusion
Source: MDPI journal article supplement (doi:10.3390/ijms24119602), 2023-05-31
Supplement: s1 [file s1]

|                              | MSC Viability |       |
|------------------------------|---------------|-------|
|                              | 1M            | 3M    |
| Serum media                  | 72.7%         | 65.9% |
| Exosome-depleted serum media | 70.8%         | 66.5% |
| Serum-free media             | 43.2%         | 39.7% |

**Table S1:** Comparing MSC viability after perfusion with serum media, exosome-depleted serum media, and serum-free media

|    | Baseline Perfusion |           | Activated Perfusion |           | Prelicensed Perfusion |           |
|----|--------------------|-----------|---------------------|-----------|-----------------------|-----------|
|    | Yield              | Viability | Yield               | Viability | Yield                 | Viability |
| 3M | 5.04e5             | 68.3%     | 1.56e6              | 62.5%     | 1.02e6                | 71.4%     |
| 3M | 4.89e5             | 65.9%     | 1.94e6              | 68.0%     | 1.37e6                | 76.9%     |
| 1M | 4.79e5             | 72.7%     |                     |           |                       |           |
| 1M | 5.29e5             | 70.8%     |                     |           |                       |           |

**Table S2:** Yield and viability of MSCs harvested from n=2 bioreactors after 72h perfusion via Accutase (Sigma Aldrich, St. Louis, MO) after 72-hour perfusion

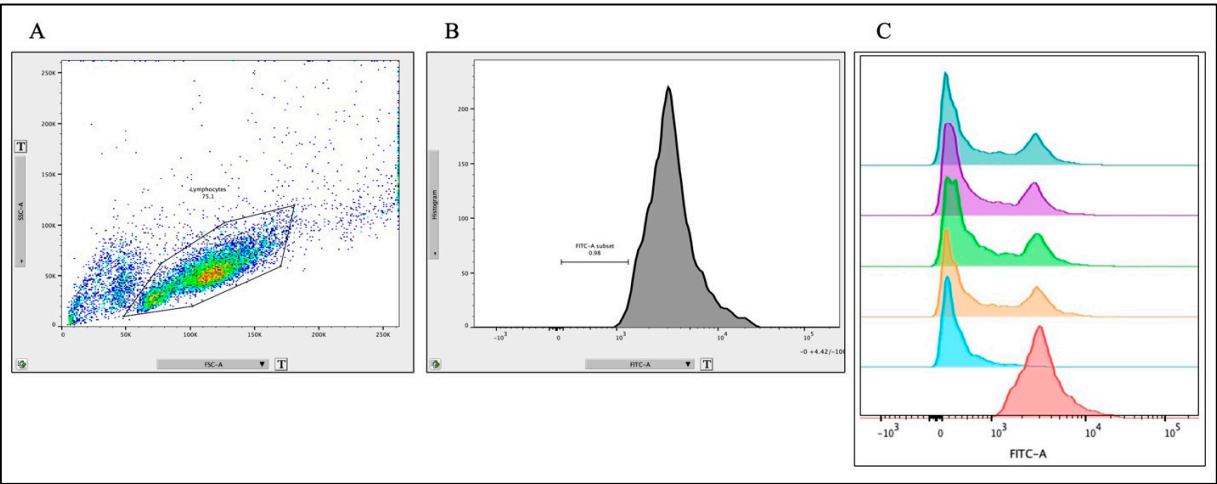

**Figure S1:** FlowJo Representative Figures and Histograms. **(A)** Gating strategy for lymphocyte selection. **(B)** Proliferative gate set with from unstimulated FITC-stained lymphocytes. **(C)** Histograms showing differences in percent proliferation between controls and fractions (bottom to top: unstimulated control, stimulated control, 4 representative fractions).

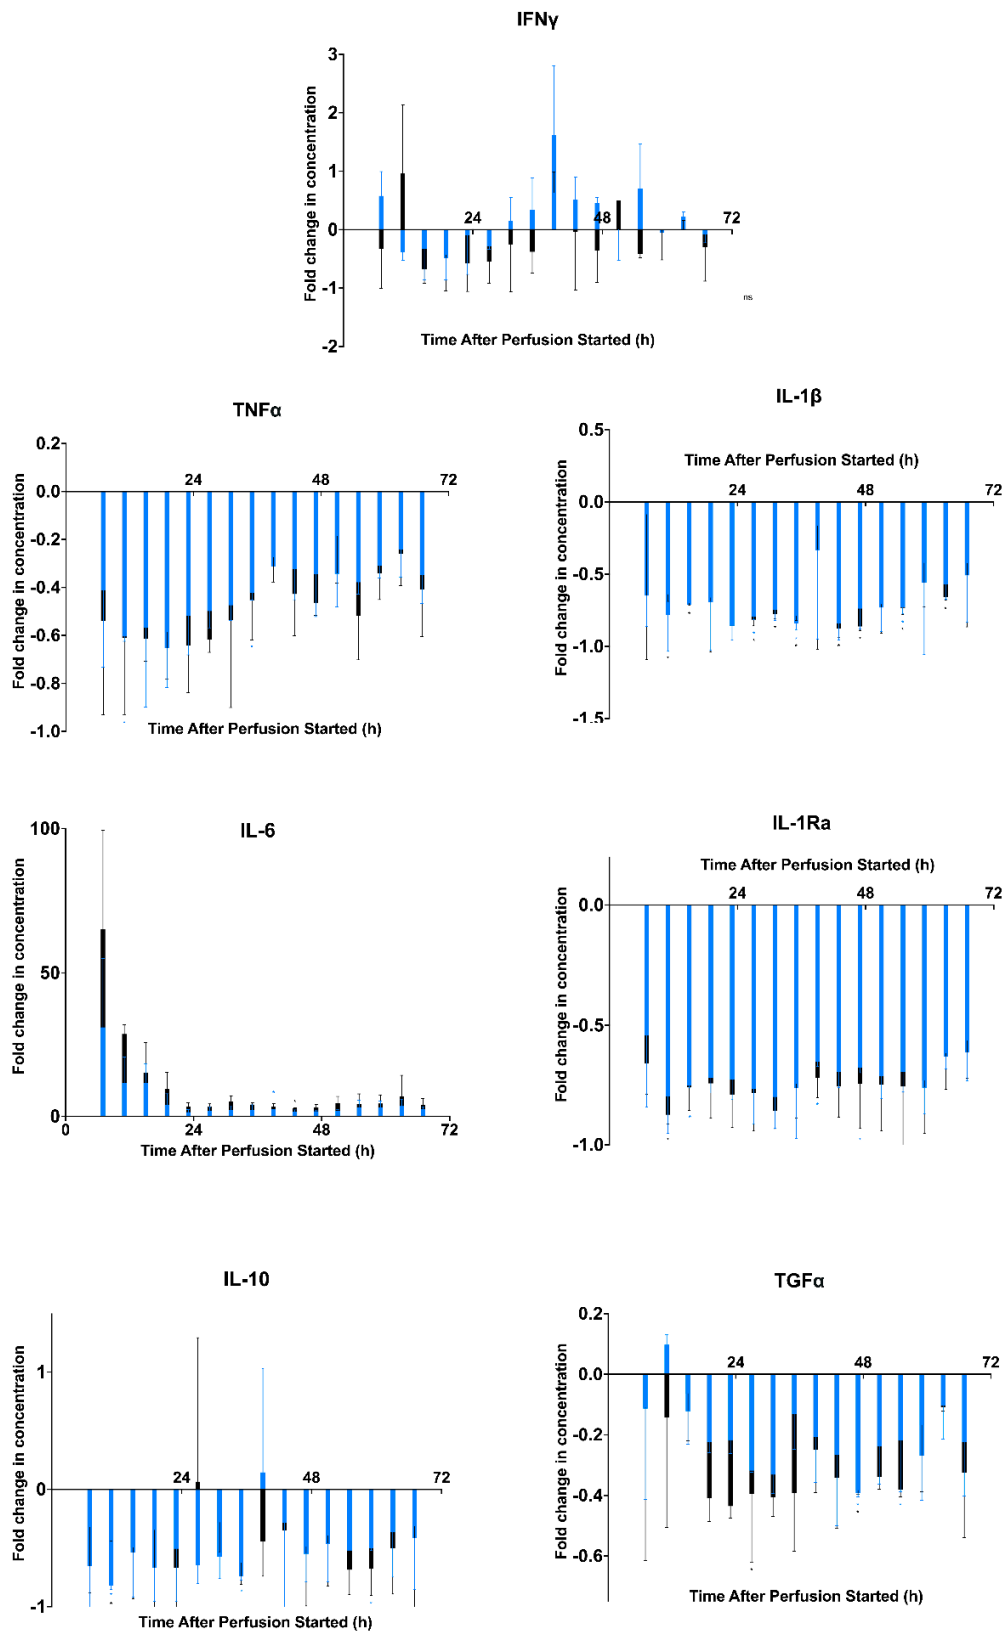

Figure S2: Cytokines analyzed from baseline perfusion potency assay

| Time After Perfusion (h) |           | TGF $\alpha$ | IFN $\gamma$ | IL-10  | IL-1Ra | IL-1 $\beta$ | IL-6   | TNF- $\alpha$ |
|--------------------------|-----------|--------------|--------------|--------|--------|--------------|--------|---------------|
| 7                        | 1M vs. 3M | >0.9999      | 0.4323       | 0.7863 | 0.8824 | 0.7734       | 0.5866 | 0.9329        |
|                          | 1M vs. 0M | 0.9522       | 0.4364       | 0.3465 | 0.3539 | 0.2145       | 0.4575 | 0.4669        |
|                          | 3M vs. 0M | 0.8726       | 0.809        | 0.7612 | 0.1349 | 0.9915       | 0.3343 | 0.4398        |
| 11                       | 1M vs. 3M | 0.7147       | 0.5071       | 0.0453 | 0.8107 | 0.7643       | 0.3093 | 0.9998        |
|                          | 1M vs. 0M | 0.8639       | 0.2478       | 0.022  | 0.1276 | 0.2103       | 0.4528 | 0.0214        |
|                          | 3M vs. 0M | 0.2191       | 0.6371       | 0.0211 | 0.0251 | 0.0469       | 0.0738 | 0.3345        |
| 15                       | 1M vs. 3M | 0.9065       | 0.7441       | 0.994  | 0.9953 |              | 0.9175 | 0.9789        |
|                          | 1M vs. 0M | 0.8567       | 0.7321       | 0.4287 | 0.0211 |              | 0.3506 | 0.3676        |
|                          | 3M vs. 0M | 0.5161       | 0.2426       | 0.5102 | 0.0895 | 0.0211       | 0.4123 | 0.1009        |
| 19                       | 1M vs. 3M | 0.2199       | 0.9933       | 0.8397 | 0.9773 | 0.9962       | 0.5612 | 0.9329        |
|                          | 1M vs. 0M | 0.1249       | 0.458        | 0.2799 | 0.0606 | 0.308        | 0.5616 | 0.1676        |
|                          | 3M vs. 0M | 0.1061       | 0.6937       | 0.8005 | 0.1338 | 0.3556       | 0.3628 | 0.2196        |
| 23                       | 1M vs. 3M | 0.0653       | 0.7255       | 0.9169 | 0.8507 | >0.9999      | 0.3418 | 0.7927        |
|                          | 1M vs. 0M | 0.0609       | 0.9785       | 0.5156 | 0.08   | 0.0786       | 0.373  | 0.2071        |
|                          | 3M vs. 0M | 0.1359       | 0.4831       | 0.331  | 0.1156 | 0.0786       | 0.2237 | 0.2008        |
| 27                       | 1M vs. 3M | 0.8904       | 0.692        | 0.7583 | 0.993  | 0.8596       | 0.5958 | 0.3422        |
|                          | 1M vs. 0M | 0.3576       | 0.1078       | 0.1591 | 0.1309 | 0.0211       | 0.4866 | 0.0932        |
|                          | 3M vs. 0M | 0.0211       | 0.4153       | 0.9969 | 0.139  | 0.0307       | 0.2012 | 0.0566        |
| 31                       | 1M vs. 3M | 0.5652       | 0.8245       | 0.508  | 0.8636 | 0.848        | 0.3794 | 0.9715        |
|                          | 1M vs. 0M | 0.1041       | 0.8672       | 0.2071 | 0.1085 | 0.0664       | 0.3426 | 0.0909        |
|                          | 3M vs. 0M | 0.1266       | 0.909        | 0.5113 | 0.0568 | 0.022        | 0.2456 | 0.4189        |
| 35                       | 1M vs. 3M | 0.4342       | 0.4451       | 0.7258 | 0.9953 | 0.491        | 0.5408 | 0.9579        |
|                          | 1M vs. 0M | 0.3169       | 0.7294       | 0.0236 | 0.1859 | 0.027        | 0.4737 | 0.0464        |
|                          | 3M vs. 0M | 0.5113       | 0.5486       | 0.188  | 0.1301 | 0.0223       | 0.0975 | 0.2351        |
| 39                       | 1M vs. 3M | 0.9569       | 0.6323       | 0.718  | 0.6703 | 0.9723       | 0.5023 |               |
|                          | 1M vs. 0M | 0.3615       | 0.4415       | 0.9712 | 0.0211 | 0.7774       | 0.0211 |               |
|                          | 3M vs. 0M | 0.4442       | 0.3358       | 0.4137 | 0.0807 | 0.9608       | 0.1635 | 0.244         |
| 43                       | 1M vs. 3M | 0.9305       | 0.7805       | 0.9948 | 0.86   | 0.9175       | 0.321  | 0.7949        |
|                          | 1M vs. 0M | 0.3136       | 0.4516       | 0.8678 | 0.0616 | 0.0917       | 0.2493 | 0.2608        |
|                          | 3M vs. 0M | 0.5131       | 0.9982       | 0.7848 | 0.1194 | 0.0444       | 0.0399 | 0.2649        |
| 47                       | 1M vs. 3M | 0.7184       | 0.4102       | 0.988  | 0.8887 | 0.6151       | 0.4767 | 0.7131        |
|                          | 1M vs. 0M | 0.0213       | 0.1435       | 0.2823 | 0.0212 | 0.129        | 0.1627 | 0.3268        |
|                          | 3M vs. 0M | 0.0211       | 0.7195       | 0.5687 | 0.1702 | 0.0221       | 0.2309 | 0.0752        |
| 51                       | 1M vs. 3M | 0.6397       |              | 0.9831 | 0.9703 | 0.9926       | 0.522  | 0.6842        |
|                          | 1M vs. 0M | 0.0787       | >0.9999      | 0.4243 | 0.0926 | 0.1518       | 0.1971 | 0.2634        |
|                          | 3M vs. 0M | 0.3355       |              | 0.5895 | 0.1741 | 0.1834       | 0.336  | 0.5727        |
| 55                       | 1M vs. 3M | 0.5765       | 0.4176       | 0.6242 | 0.9536 | 0.9963       | 0.9043 | 0.6699        |
|                          | 1M vs. 0M | 0.0414       | 0.5926       | 0.926  | 0.0804 | 0.0342       | 0.4898 | 0.0876        |
|                          | 3M vs. 0M | 0.4624       | 0.1024       | 0.2044 | 0.235  | 0.0397       | 0.4685 | 0.2345        |
| 59                       | 1M vs. 3M | 0.8622       |              | 0.6538 | 0.9853 | 0.9437       | 0.8826 | 0.9259        |
|                          | 1M vs. 0M | 0.6652       |              | 0.0253 | 0.0986 | 0.5148       | 0.4385 | 0.1136        |

|    |           |        |        |        |        |        |        |        |
|----|-----------|--------|--------|--------|--------|--------|--------|--------|
|    | 3M vs. 0M | 0.3454 | 0.9997 | 0.2206 | 0.2023 | 0.4375 | 0.4221 | 0.2118 |
| 63 | 1M vs. 3M | 0.998  | 0.4143 | 0.9337 | 0.9939 | 0.6191 | 0.842  | 0.9882 |
|    | 1M vs. 0M | 0.0891 | 0.2344 | 0.5804 | 0.0539 | 0.1193 | 0.4236 | 0.3031 |
|    | 3M vs. 0M | 0.5867 | 0.9999 | 0.4635 | 0.1603 | 0.0214 | 0.5932 | 0.3268 |
| 67 | 1M vs. 3M | 0.8762 | 0.8808 | 0.9841 | 0.9365 | 0.9752 | 0.6895 | 0.9271 |
|    | 1M vs. 0M | 0.4082 | 0.7829 | 0.5809 | 0.1289 | 0.3927 | 0.2393 | 0.2281 |
|    | 3M vs. 0M | 0.4705 | 0.8    | 0.832  | 0.183  | 0.5706 | 0.3358 | 0.3081 |

**Table S3:** p-values from multiple unpaired student's t-test comparing cytokine secretions in cocultures with fractions from 3 M, 1 M, and 0 M acellular control in baseline perfusion.

| Time After Perfusion (h) | p-values           |                       |
|--------------------------|--------------------|-----------------------|
|                          | Inflamed Perfusion | Prelicensed Perfusion |
| 1                        | 0.000813           | 0.003915              |
| 3                        | 0.004642           | 0.003864              |
| 5                        | 0.295765           | 0.000467              |
| 7                        | 0.000384           | 0.005096              |
| 9                        | 0.00313            | 0.000596              |
| 11                       | 0.013266           | 0.003204              |
| 13                       | 0.00875            | 0.008016              |
| 15                       | 0.298488           | 0.006995              |
| 17                       | 0.005008           | 0.001701              |
| 19                       | 0.078466           | 0.000294              |
| 21                       | 0.034827           | 0.00311               |
| 23                       | 0.547231           | 0.000632              |
| 25                       | 0.015024           | 0.037852              |
| 27                       | 0.015058           | 0.000221              |
| 29                       | 0.040048           | 0.00641               |
| 31                       | 0.000939           | <0.000001             |
| 33                       | 0.016319           | 0.001946              |
| 35                       | 0.003877           | 0.007466              |
| 37                       | 0.001703           | 0.004262              |
| 39                       | 0.000135           | 0.01306               |
| 41                       | 0.007751           | 0.007984              |
| 43                       | 0.064586           | 0.002277              |
| 45                       | 0.107832           | 0.00187               |
| 47                       | 0.07936            | 0.001989              |
| 49                       | 0.146812           | 0.002079              |
| 51                       | 0.024674           | 0.003636              |
| 53                       | 0.337186           | 0.001121              |
| 55                       | 0.023983           | 0.007027              |
| 57                       | 0.029411           | 0.001492              |
| 59                       | 0.006614           | 0.005578              |
| 61                       | 0.040758           | 0.001378              |
| 63                       | 0.002682           | 0.004872              |
| 65                       | 0.258344           | 0.000368              |
| 67                       | 0.003859           | 0.010858              |

**Table S4:** p-values from multiple unpaired student's t-test comparing potency of fractions 3M to 0M acellular control in both inflamed and prelicensed perfusions

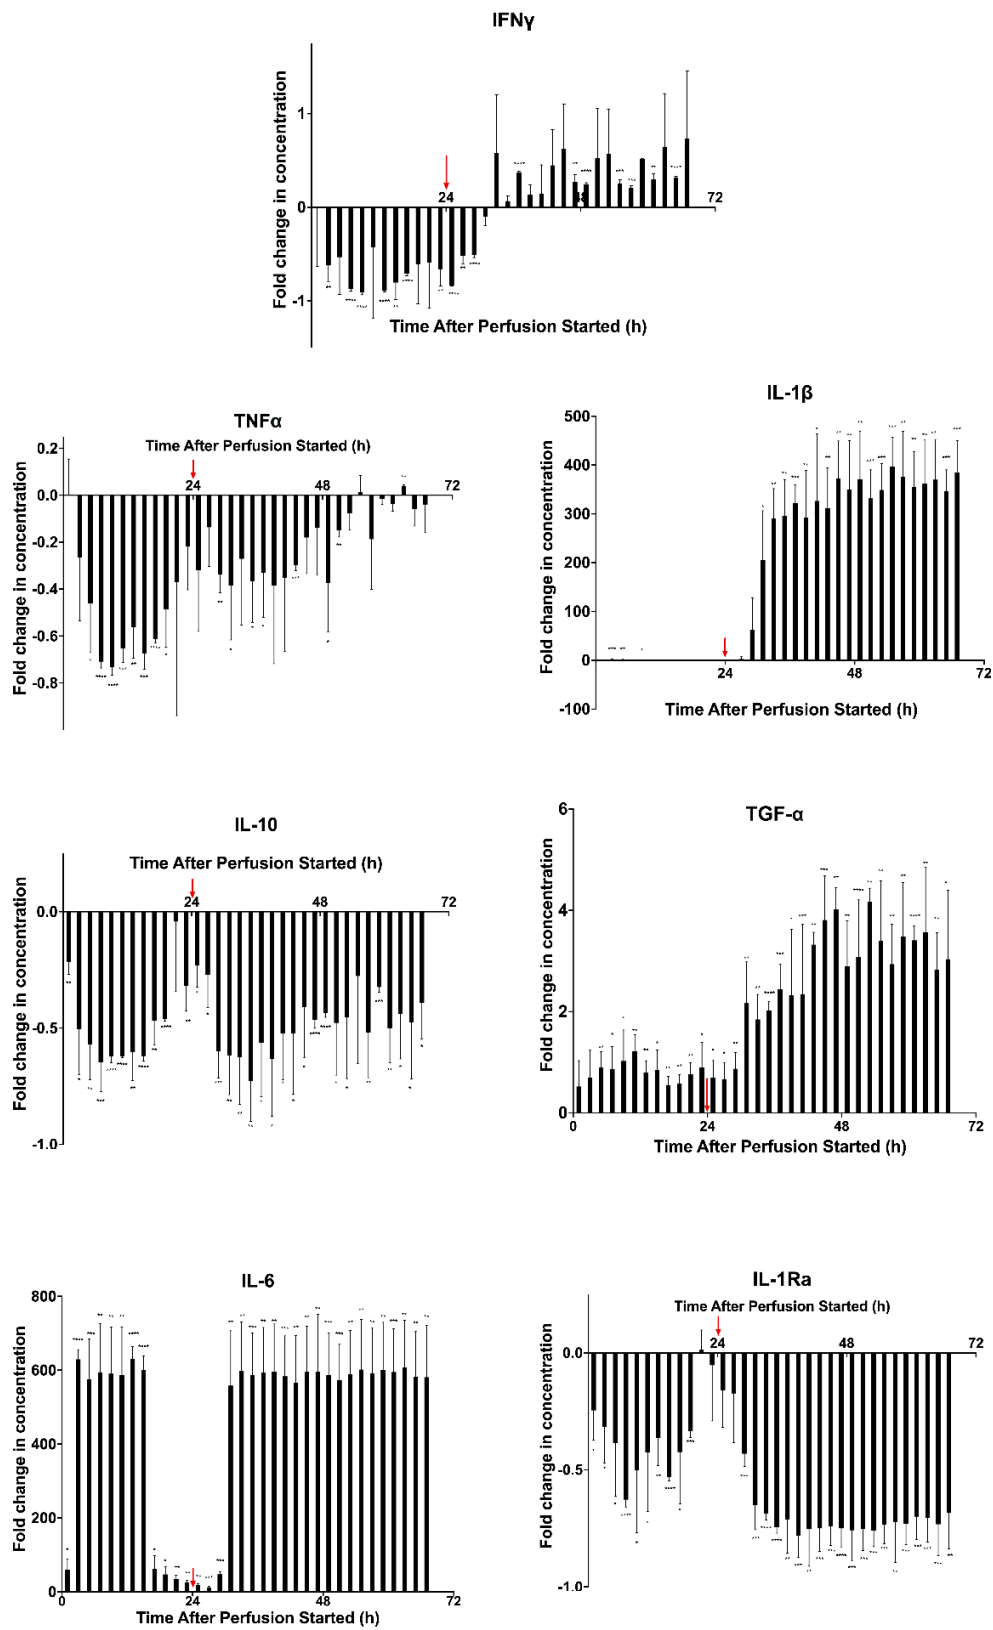

**Figure S3:** Cytokines analyzed from inflamed perfusion potency assay using 3 M cell dosage

| Time After Perfusion (h) | TGF $\alpha$ | IFN $\gamma$ | IL-10     | IL-1Ra    | IL-1 $\beta$ | IL-6     | TNF- $\alpha$ |
|--------------------------|--------------|--------------|-----------|-----------|--------------|----------|---------------|
| 1                        | 0.150661     | 0.998704     | 0.004767  | 0.0353    | 0.403698     | 0.02375  | 0.998355      |
| 3                        | 0.086919     | 0.006111     | 0.01131   | 0.029881  | 0.000153     | 0.000024 | 0.167188      |
| 5                        | 0.007421     | 0.081905     | 0.002825  | 0.042609  | 0.001973     | 0.000797 | 0.01786       |
| 7                        | 0.027517     | 0.000006     | 0.000893  | 0.00004   | 0.115151     | 0.001465 | 0.000018      |
| 9                        | 0.044085     | 0.000011     | 0.000003  | 0.031718  | 0.011455     | 0.001245 | 0.000028      |
| 11                       | 0.003046     | 0.378456     | <0.000001 | 0.043547  | 0.76663      | 0.001417 | 0.000279      |
| 13                       | 0.004244     | 0.000002     | 0.001021  | 0.00606   | 0.77341      | 0.000046 | 0.001773      |
| 15                       | 0.019838     | 0.003402     | 0.000014  | 0.000008  | 0.82107      | 0.000076 | 0.000292      |
| 17                       | 0.005293     | 0.000012     | 0.001394  | 0.03602   | 0.336614     | 0.042111 | 0.000006      |
| 19                       | 0.003835     | 0.073856     | <0.000001 | 0.000171  | 0.857734     | 0.017933 | 0.010585      |
| 21                       | 0.004605     | 0.105768     | 0.805953  | 0.780221  | 0.600995     | 0.003182 | 0.45229       |
| 23                       | 0.036751     | 0.005939     | 0.007463  | 0.72014   | 0.146356     | 0.002749 | 0.110611      |
| 25                       | 0.024767     | <0.000001    | 0.019316  | 0.152138  | 0.532688     | 0.002873 | 0.099226      |
| 27                       | 0.024247     | 0.001864     | 0.036066  | 0.22727   | 0.35072      | 0.000588 | 0.229258      |
| 29                       | 0.009649     | 0.000038     | 0.000817  | 0.000164  | 0.178589     | 0.000208 | 0.001873      |
| 31                       | 0.009992     | 0.147211     | 0.006005  | 0.00042   | 0.024038     | 0.002868 | 0.044564      |
| 33                       | 0.00294      | 0.179789     | 0.006011  | 0.000002  | 0.001145     | 0.001466 | 0.172243      |
| 35                       | 0.000048     | 0.095342     | 0.001905  | <0.000001 | 0.00226      | 0.000883 | 0.022842      |
| 37                       | 0.000941     | 0.000018     | 0.01388   | 0.001028  | 0.000123     | 0.001057 | 0.040508      |
| 39                       | 0.035236     | 0.085173     | 0.010948  | 0.000128  | 0.006394     | 0.001286 | 0.113721      |
| 41                       | 0.042398     | 0.424557     | 0.01023   | 0.001099  | 0.014506     | 0.000766 | 0.123903      |
| 43                       | 0.000128     | 0.111568     | 0.025452  | 0.000193  | 0.002774     | 0.00152  | 0.000195      |
| 45                       | 0.003716     | 0.085595     | 0.031288  | 0.000104  | 0.001115     | 0.00111  | 0.112358      |
| 47                       | 0.000388     | 0.005568     | 0.000019  | 0.000079  | 0.003687     | 0.002738 | 0.178366      |
| 49                       | 0.005103     | 0.000067     | 0.000026  | 0.000527  | 0.002909     | 0.000928 | 0.035402      |
| 51                       | 0.009098     | 0.167303     | 0.021156  | 0.00014   | 0.000589     | 0.000502 | 0.001461      |
| 53                       | 0.000082     | 0.104153     | 0.040333  | 0.000041  | 0.000355     | 0.001011 | 0.132714      |

|    |          |           |          |          |          |          |          |
|----|----------|-----------|----------|----------|----------|----------|----------|
| 55 | 0.007708 | 0.000951  | 0.273547 | 0.000099 | 0.000336 | 0.00152  | 0.408    |
| 57 | 0.003019 | 0.000434  | 0.009481 | 0.001941 | 0.002229 | 0.001082 | 0.195187 |
| 59 | 0.004731 | <0.000001 | 0.000113 | 0.000154 | 0.001138 | 0.001311 | 0.234997 |
| 61 | 0.000033 | 0.001946  | 0.004207 | 0.000256 | 0.002078 | 0.000916 | 0.110996 |
| 63 | 0.008553 | 0.119506  | 0.016961 | 0.000274 | 0.001481 | 0.001173 | 0.001763 |
| 65 | 0.00268  | 0.000014  | 0.026926 | 0.000715 | 0.000159 | 0.00118  | 0.211141 |
| 67 | 0.017821 | 0.152097  | 0.01214  | 0.001517 | 0.000522 | 0.001955 | 0.56982  |

**Table S5:** p-values from multiple unpaired student's t-test comparing cytokine secretions in cocultures with fractions 3M to 0M acellular control in inflamed perfusion

| Time After Perfusion (h) | TGF $\alpha$ | IFN $\gamma$ | IL-10     | IL-1Ra    | IL-1 $\beta$ | IL-6     | TNF- $\alpha$ |
|--------------------------|--------------|--------------|-----------|-----------|--------------|----------|---------------|
| 1                        | 0.005555     | 0.077269     | 0.001584  | 0.118733  | 0.139199     | 0.10173  |               |
| 3                        | 0.000177     | 0.00002      | 0.234367  | 0.000578  | 0.032428     | 0.094421 | 0.002068      |
| 5                        | <0.000001    | 0.89284      | <0.000001 | 0.000757  | 0.009219     | 0.100994 | 0.000392      |
| 7                        | 0.007237     | 0.039236     | 0.003569  | 0.00037   | 0.350967     | 0.090643 | 0.009828      |
| 9                        | 0.000016     | 0.497654     | 0.043189  | 0.004179  | 0.14571      | 0.166714 | 0.000495      |
| 11                       | 0.022832     | 0.016853     | 0.006754  | 0.000004  | 0.314744     | 0.173093 | 0.014431      |
| 13                       | 0.0068       | 0.690115     | 0.000004  | 0.000135  | 0.065716     | 0.069829 | 0.003015      |
| 15                       | 0.001822     | 0.731507     | 0.00455   | <0.000001 | 0.000004     | 0.005085 | 0.000242      |
| 17                       | 0.128641     | 0.585038     | 0.009934  | 0.00005   | 0.018892     | 0.003303 | 0.036625      |
| 19                       | 0.033026     | 0.808613     | 0.206608  | 0.000177  | 0.011629     | 0.007078 | 0.000147      |
| 21                       | 0.019088     | 0.600717     | 0.000113  | 0.000019  | 0.000989     | 0.007667 | 0.004179      |
| 23                       | 0.037314     | 0.463628     | 0.020518  | 0.000006  | <0.000001    | 0.01693  | 0.009888      |
| 25                       | 0.017717     | 0.033391     | <0.000001 | 0.000021  | <0.000001    | 0.016881 | 0.02517       |
| 27                       | 0.000009     | 0.0232       | 0.015882  | 0.000075  | 0.00001      | 0.009064 | 0.039643      |
| 29                       | 0.015392     | 0.086301     | 0.320096  | 0.000026  | 0.00092      | 0.015329 | 0.007046      |
| 31                       | 0.016635     | 0.547506     | 0.033311  | 0.000209  | 0.000136     | 0.026678 | 0.002125      |
| 33                       | 0.009125     | 0.110787     | 0.522473  | 0.000013  | 0.000517     | 0.027571 | 0.030371      |
| 35                       | 0.000512     | 0.399927     | 0.016338  | 0.000055  | 0.00211      | 0.025288 | 0.625119      |



|    |          |          |           |           |           |          |          |
|----|----------|----------|-----------|-----------|-----------|----------|----------|
| 37 | 0.028116 | 0.506768 | 0.000633  | 0.00005   | 0.000061  | 0.019816 | 0.001416 |
| 39 | 0.001678 | 0.328186 | 0.002963  | 0.0001    | 0.00283   | 0.023384 | 0.09206  |
| 41 | 0.015792 | 0.322262 | 0.02792   | 0.000378  | 0.013246  | 0.036994 | 0.006721 |
| 43 | 0.003291 | 0.339657 | 0.054292  | 0.000121  | 0.019076  | 0.035203 | 0.000106 |
| 45 | 0.069552 | 0.306435 | 0.00823   | 0.000029  | 0.001536  | 0.020992 | 0.007523 |
| 47 | 0.091779 | 0.116814 | 0.042252  | 0.000011  | 0.026763  | 0.016291 | 0.729702 |
| 49 | 0.001684 | 0.123099 | 0.009335  | <0.000001 | 0.000014  | 0.016149 | 0.541071 |
| 51 | 0.03633  | 0.273346 | 0.014902  | 0.000049  | 0.024825  | 0.017799 | 0.047543 |
| 53 | 0.001673 | 0.010772 | <0.000001 | 0.000037  | 0.000756  | 0.018451 | 0.163925 |
| 55 | 0.002496 | 0.387969 | 0.065969  | 0.000037  | 0.006877  | 0.029766 | 0.040184 |
| 57 | 0.000512 | 0.777867 | 0.004279  | 0.000286  | 0.005546  | 0.029169 | 0.819038 |
| 59 | 0.000066 | 0.257934 | 0.000007  | 0.000016  | 0.001607  | 0.014279 | 0.128894 |
| 61 | 0.000006 | 0.581033 | 0.000762  | 0.009294  | 0.000031  | 0.02835  | 0.000009 |
| 63 | 0.051955 | 0.920623 | 0.156122  | 0.000203  | 0.061286  | 0.019429 | 0.00055  |
| 65 | 0.007184 | 0.40146  | 0.125512  | 0.001804  | 0.001601  | 0.016117 | 0.089647 |
| 67 | 0.002569 | 0.191089 | 0.115879  | 0.000265  | 0.063946  | 0.021706 | 0.000034 |
| 69 |          | 0.531473 | 0.145982  | 0.000216  | <0.000001 | 0.023704 | 0.002684 |
| 71 |          |          |           |           |           |          | 0.06593  |

**Table S6:** p-values from multiple unpaired student's t-test comparing cytokine secretions in cocultures with fractions 3M to 0M acellular control in prelicensed perfusion

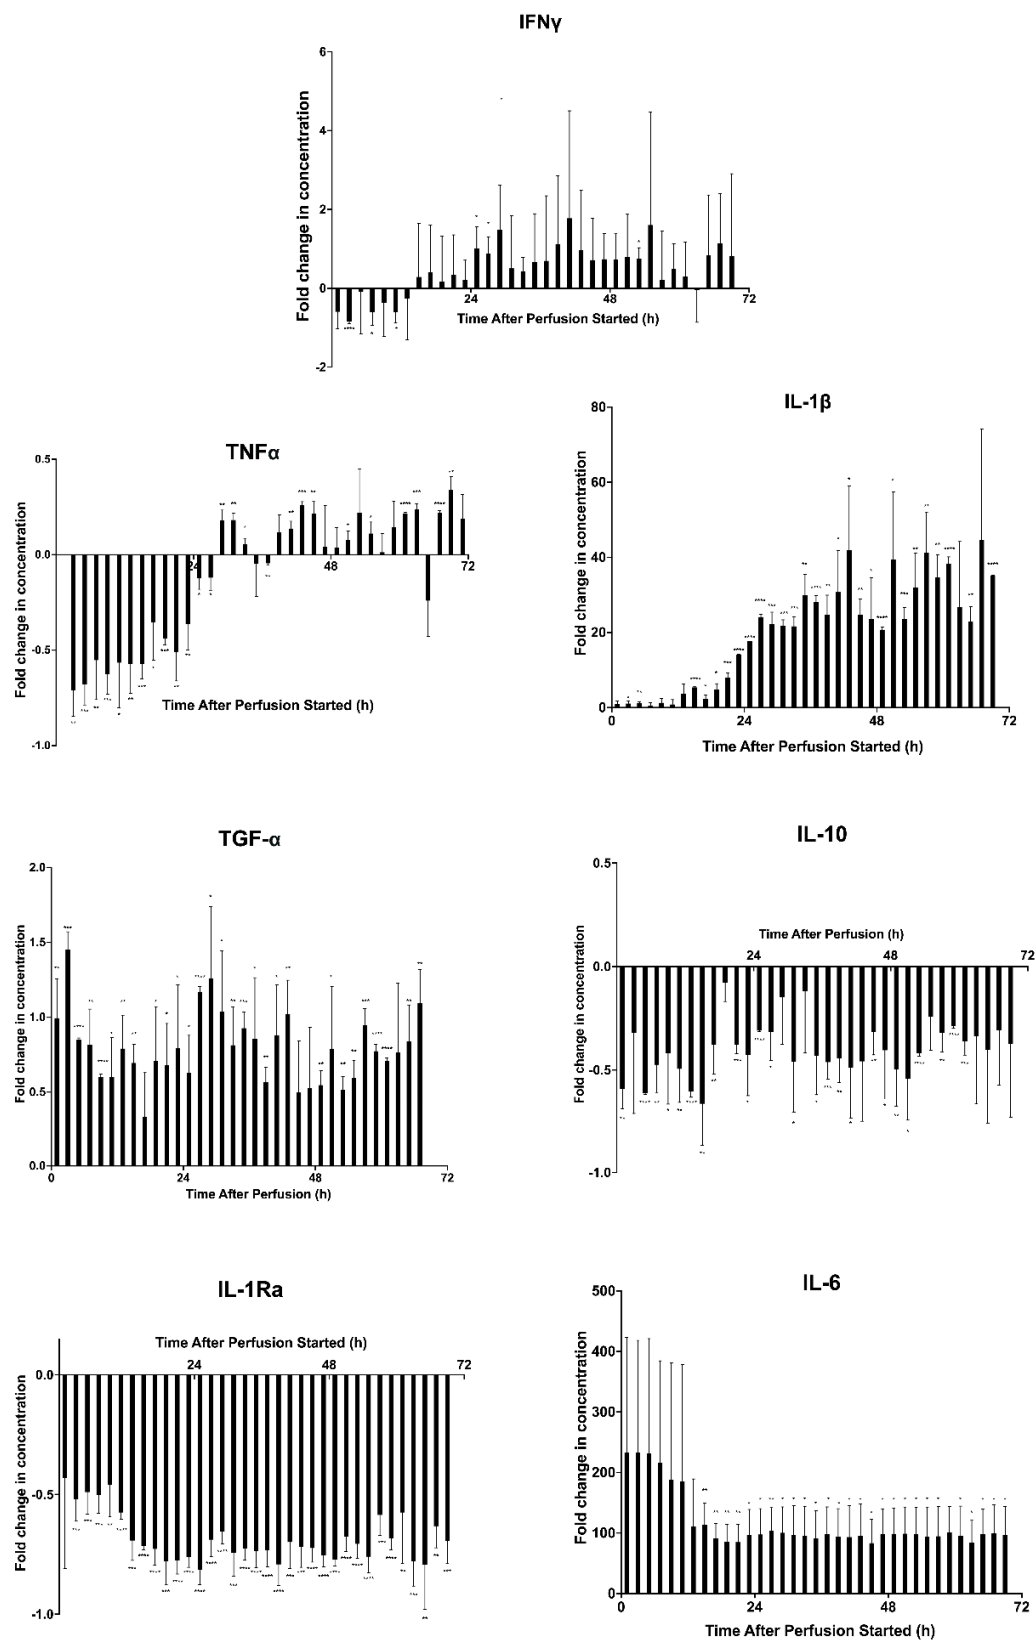

**Figure S4:** Cytokines analyzed from prelicensed perfusion potency assay using 3 M cell dosage
